# Supplementary material for: The O–P–O bridged Mn2(salen)2chains showing coexistence of single chain magnet and metamagnet behaviour
Source: Royal Society of Chemistry journal article supplement (doi:10.1039/c4dt03888f), 2015-01-01
Supplement: c4dt03888f1.pdf [file c4dt03888f1.pdf]

## Supporting Information

### **The O-P-O bridged Mn<sub>2</sub>(salen)<sub>2</sub> chains showing coexistence of single chain magnet and metamagnet behaviour**

Ting-Ting Wang,<sup>a</sup> Min Ren,<sup>a</sup> Song-Song Bao,<sup>a</sup> Zhong-Sheng Cai,<sup>a</sup> Bin Liu,<sup>b</sup> Ze-Hua  
Zheng,<sup>a</sup> Zhong-Li Xu<sup>a</sup> and Li-Min Zheng\*<sup>a</sup>

**Table S1.** Selected bond lengths (Å) and angles (°) for **1**.

|            |           |            |           |
|------------|-----------|------------|-----------|
| Mn1-O1     | 1.871(2)  | Mn1-O2     | 1.874(2)  |
| Mn1-N1     | 1.979(2)  | Mn1-N2     | 1.975(2)  |
| Mn1-O5     | 2.095(2)  | Mn1···O1A  | 3.570(2)  |
| Mn2-O4     | 1.937(2)  | Mn2-O3     | 1.890(2)  |
| Mn2-N4     | 1.991(2)  | Mn2-N3     | 1.998(2)  |
| Mn2-O6     | 2.094(2)  | Mn2-O4B    | 2.387(2)  |
|            |           |            |           |
| Mn1-O1-Mn1 | 84.19(7)  | Mn2-O4-Mn2 | 101.84(7) |
| O1-Mn1-O2  | 90.45(9)  | O1-Mn1-N2  | 162.61(9) |
| O2-Mn1-N2  | 91.82(10) | O1-Mn1-N1  | 90.58(10) |
| O2-Mn1-N1  | 162.25(9) | N2-Mn1-N1  | 82.12(10) |
| O1-Mn1-O5  | 95.16(8)  | O2-Mn1-O5  | 100.67(8) |
| N2-Mn1-O5  | 101.34(8) | N1-Mn1-O5  | 96.88(8)  |
| O3-Mn2-O4  | 96.85(8)  | O3-Mn2-N4  | 170.74(8) |
| O4-Mn2-N4  | 89.49(8)  | O3-Mn2-N3  | 91.22(9)  |
| O4-Mn2-N3  | 167.24(8) | N4-Mn2-N3  | 81.42(9)  |
| O3-Mn2-O6  | 95.17(7)  | O4-Mn2-O6  | 87.65(7)  |
| N4-Mn2-O6  | 91.81(8)  | N3-Mn2-O6  | 101.49(8) |
| O3-Mn2-O4B | 90.87(7)  | O4-Mn2-O4B | 78.16(7)  |
| N4-Mn2-O4B | 83.82(7)  | N3-Mn2-O4B | 91.90(7)  |
| O6-Mn2-O4B | 165.16(7) |            |           |

Symmetry codes: A: -x, 1-y, 2-z, B: 1-x, -y, 2-z.

**Table S2.** Selected bond lengths (Å) and angles (°) for **2**.

|             |            |             |            |
|-------------|------------|-------------|------------|
| Mn1-O1      | 1.875(2)   | Mn1-O2      | 1.895(2)   |
| Mn1-N1      | 1.968(2)   | Mn1-N2      | 1.979(2)   |
| Mn1-O5      | 2.082(2)   | Mn1-O2A     | 2.532(2)   |
| Mn2-O4      | 1.873(2)   | Mn2-O3      | 1.882(2)   |
| Mn2-N4      | 1.981(2)   | Mn2-N3      | 1.985(3)   |
| Mn2-O6      | 2.071(2)   | Mn2-O3B     | 2.890(2)   |
| <hr/>       |            |             |            |
| Mn1-O2-Mn1A | 98.36(8)   | Mn2-O3-Mn2B | 97.72(9)   |
| O1-Mn1-O2   | 94.41(8)   | O1-Mn1-N1   | 92.20(9)   |
| O2-Mn1-N1   | 165.81(10) | O1-Mn1-N2   | 173.42(10) |
| O2-Mn1-N2   | 89.74(9)   | N1-Mn1-N2   | 82.66(10)  |
| O1-Mn1-O5   | 96.24(9)   | O2-Mn1-O5   | 97.00(9)   |
| N1-Mn1-O5   | 94.74(10)  | N2-Mn1-O5   | 88.30(10)  |
| O4-Mn2-O3   | 93.01(9)   | O4-Mn2-N4   | 91.97(10)  |
| O3-Mn2-N4   | 165.15(10) | O4-Mn2-N3   | 163.69(10) |
| O3-Mn2-N3   | 90.10(10)  | N4-Mn2-N3   | 81.35(11)  |
| O4-Mn2-O6   | 96.75(9)   | O3-Mn2-O6   | 97.84(9)   |
| N4-Mn2-O6   | 95.45(9)   | N3-Mn2-O6   | 98.68(10)  |

Symmetry codes: A: 1-x, 1-y, -z, B: 1-x, 2-y, 1-z.

**Table S3.** Selected bond lengths (Å) and angles (°) for **3**.

|             |           |             |            |
|-------------|-----------|-------------|------------|
| Mn1-O1      | 1.870(2)  | Mn1-O2      | 1.909(2)   |
| Mn1-N1      | 1.974(2)  | Mn1-N2      | 1.986(2)   |
| Mn1-O5      | 2.093(2)  | Mn1-O2A     | 2.463(2)   |
| Mn2-O4      | 1.876(2)  | Mn2-O3      | 1.885(2)   |
| Mn2-N4      | 1.984(2)  | Mn2-N3      | 1.987(2)   |
| Mn2-O6      | 2.071(2)  | Mn2-O3B     | 2.888(2)   |
| Mn1-O2-Mn1A | 98.60(8)  | Mn2-O3-Mn2B | 97.12(8)   |
| O1-Mn1-O2   | 94.89(8)  | O1-Mn1-N1   | 92.07(9)   |
| O2-Mn1-N1   | 166.29(9) | O1-Mn1-N2   | 173.43(9)  |
| O2-Mn1-N2   | 89.39(9)  | N1-Mn1-N2   | 82.74(10)  |
| O1-Mn1-O5   | 96.04(8)  | O2-Mn1-O5   | 95.44(8)   |
| N1-Mn1-O5   | 95.56(9)  | N2-Mn1-O5   | 88.49(9)   |
| O1-Mn1-O2A  | 90.62(7)  | O2-Mn1-O2A  | 81.40(8)   |
| N1-Mn1-O2A  | 86.73(8)  | N2-Mn1-O2A  | 85.08(8)   |
| O5-Mn1-O2A  | 172.86(7) | O4-Mn2-O3   | 92.69(8)   |
| O4-Mn2-N4   | 92.07(9)  | O3-Mn2-N4   | 165.53(10) |
| O4-Mn2-N3   | 163.20(9) | O3-Mn2-N3   | 89.97(9)   |
| N4-Mn2-N3   | 81.65(10) | O4-Mn2-O6   | 97.74(9)   |
| O3-Mn2-O6   | 99.06(9)  | N4-Mn2-O6   | 93.83(10)  |
| N3-Mn2-O6   | 98.21(9)  |             |            |

Symmetry codes: A: 1-x, -y, -z, B: 1-x, 1-y, 1-z.

**Table S4.** The parameters obtained by fitting the ac magnetic susceptibilities for **2** under 0 Oe dc field at 2.0-3.0 K.

| T(K) | $\chi_T / \text{cm}^3 \cdot \text{mol}^{-1}$ | $\chi_S / \text{cm}^3 \cdot \text{mol}^{-1}$ | $\ln(\tau / \text{s})$ | $\alpha$ | $R^b$                 |
|------|----------------------------------------------|----------------------------------------------|------------------------|----------|-----------------------|
| 2.0  | 2.17                                         | 2.20                                         | -4.98                  | 0.14     | $1.15 \times 10^{-4}$ |
| 2.5  | 6.88                                         | 2.76                                         | -7.85                  | 0.05     | $2.67 \times 10^{-6}$ |
| 3.0  | 5.65                                         | 2.37                                         | -10.53                 | 0.02     | $5.79 \times 10^{-6}$ |

**Table S5.** The parameters obtained by fitting the ac magnetic susceptibilities for **3** under zero dc field at 2.0-3.0 K.

| T(K) | $\chi_T / \text{cm}^3 \cdot \text{mol}^{-1}$ | $\chi_S / \text{cm}^3 \cdot \text{mol}^{-1}$ | $\ln(\tau / \text{s})$ | $\alpha$ | $R^a$                 |
|------|----------------------------------------------|----------------------------------------------|------------------------|----------|-----------------------|
| 2.0  | 0.69                                         | 0.21                                         | -6.16                  | 0.11     | $1.58 \times 10^{-4}$ |
| 2.5  | 2.63                                         | 0.20                                         | -8.67                  | 0.03     | $4.02 \times 10^{-5}$ |
| 3.0  | 3.28                                         | 0.20                                         | -11.13                 | 0.01     | $1.72 \times 10^{-5}$ |

$$^a R = \frac{\sum [(\chi'_{obs} - \chi'_{cal})^2 + (\chi''_{obs} - \chi''_{cal})^2]}{\sum [\chi'^2_{obs} + \chi''^2_{obs}]}$$

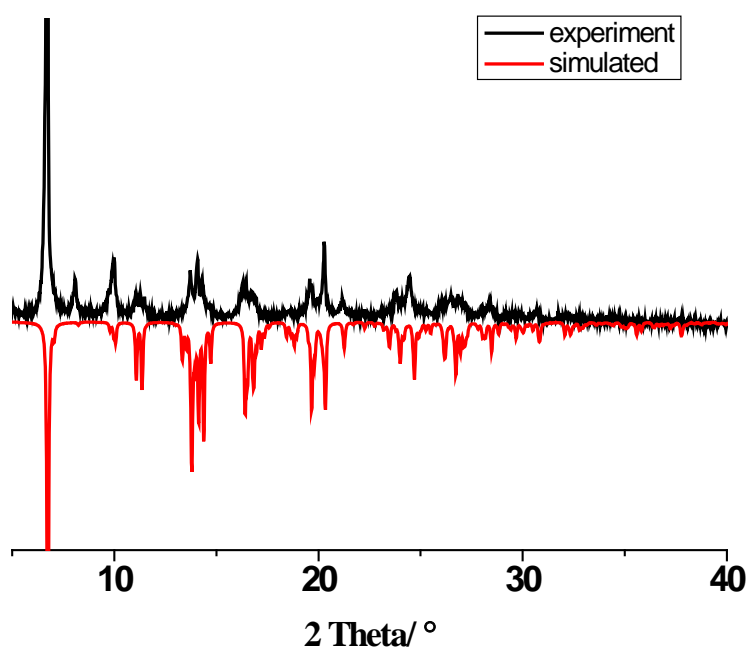

**Figure S1.** PXRD patterns for compound 1.

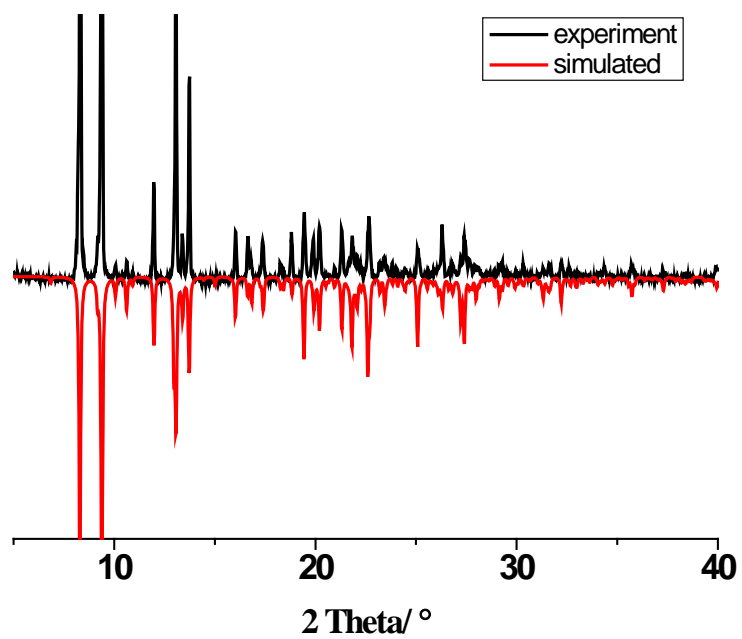

**Figure S2.** PXRD patterns for compound 2.

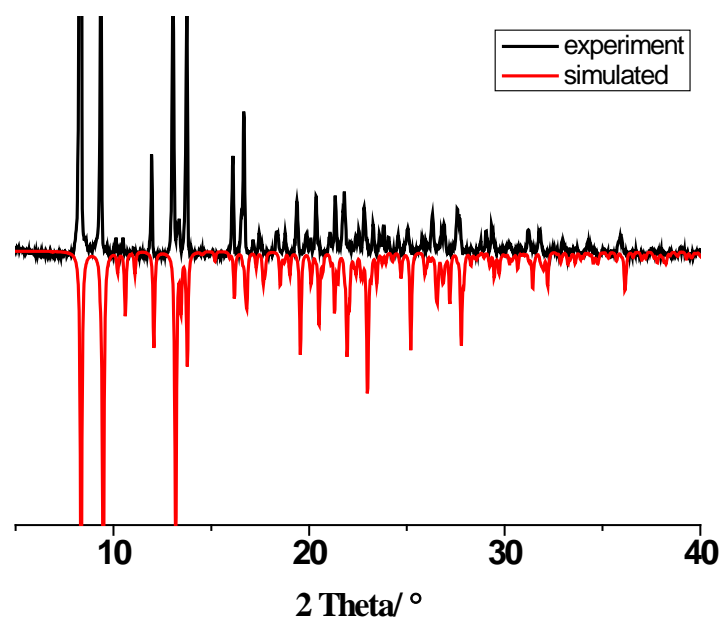

**Figure S3.** PXRD patterns for compound 3.

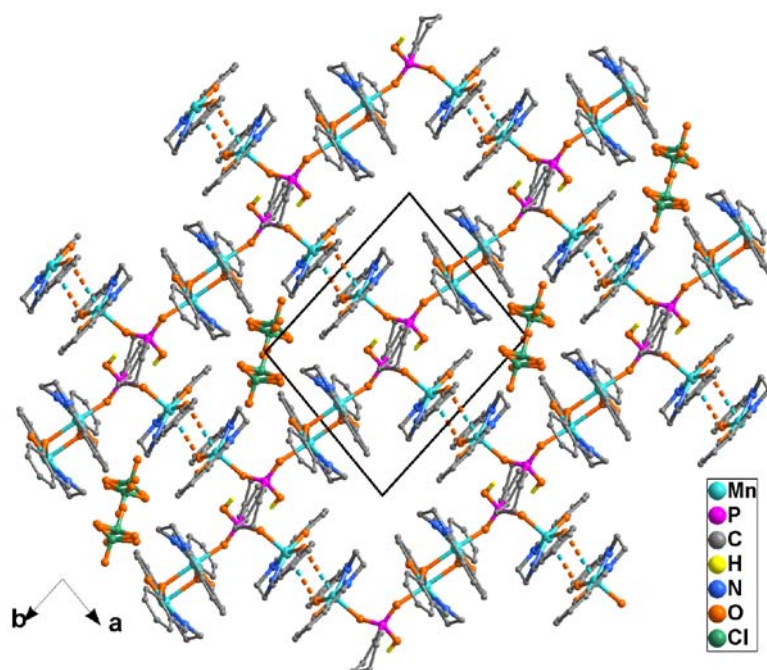

**Figure S4.** The packing diagram of structure 1 viewed along the  $c$ -axis.

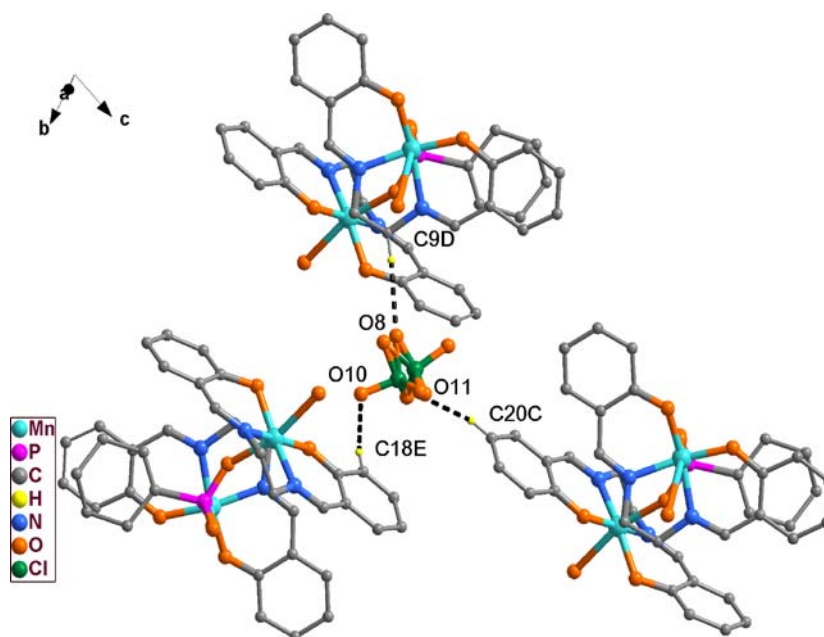

**Figure S5.** The hydrogen bond interactions between the  $\text{ClO}_4^-$  anion and chains in **1**. The hydrogen-bonds are shown as dotted lines. Symmetry codes: D:  $1-x, 1-y, 1-z$ ; E:  $1+x, 1+y, -1+z$ .

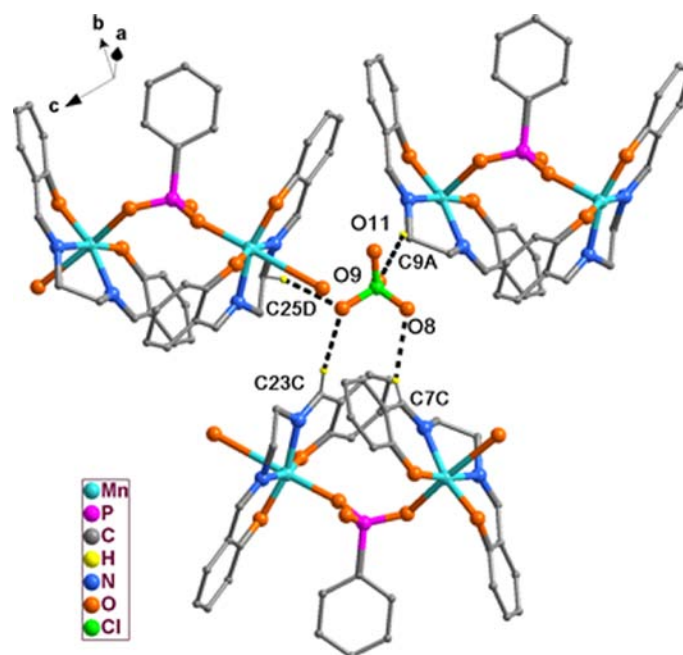

**Figure S6.** The hydrogen bond interactions between the  $\text{ClO}_4^-$  anion and chains in **2**. The hydrogen-bonds are shown as dotted lines. The  $\text{C}\cdots\text{O}$  distances are  $3.278(5)$  Å for  $\text{C7C}\cdots\text{O8}$ ,  $3.207(7)$  Å for  $\text{C9A}\cdots\text{O11}$ ,  $3.414(6)$  Å for  $\text{C23C}\cdots\text{O9}$  and  $3.427(6)$  Å for  $\text{C25D}\cdots\text{O9}$ . Symmetry codes: C:  $x, -1+y, z$ ; D:  $2-x, 1-y, 1-z$ .

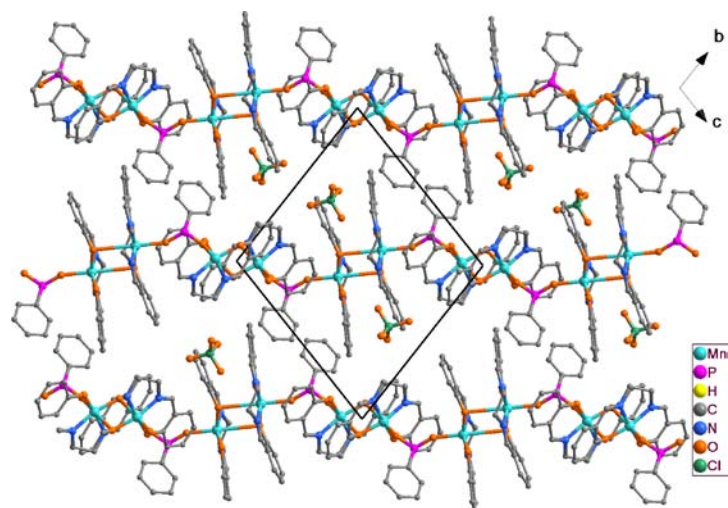

**Figure S7.** The packing diagram of **3** along *a* axis. All the hydrogen atoms have been omitted for clarity.

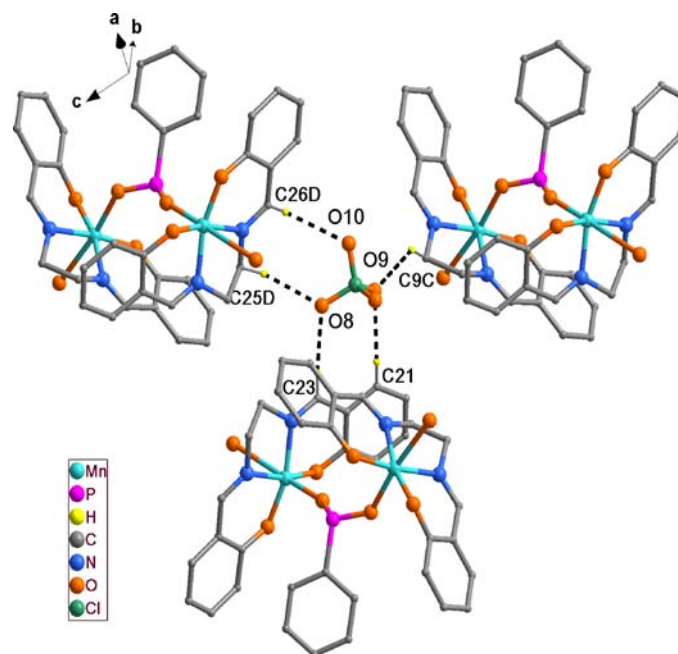

**Figure S8.** The hydrogen bondings among the chains around the  $\text{ClO}_4^-$  anion in **3**. Hydrogen atoms except for those are involved in the hydrogen-bondings have been omitted for clarity. The hydrogen-bonds are shown as dotted lines. The C $\cdots$ O distances are 3.389(5) Å for C21 $\cdots$ O9, 3.338(4) Å for C23 $\cdots$ O8, 3.139(5) Å for C9C $\cdots$ O9, 3.319(4) Å for C25D $\cdots$ O8 and 3.356(4) Å for C26D $\cdots$ O10. Symmetry code: C: 1-x, 1-y, z; D: 2-x, 1-y, 1-z.



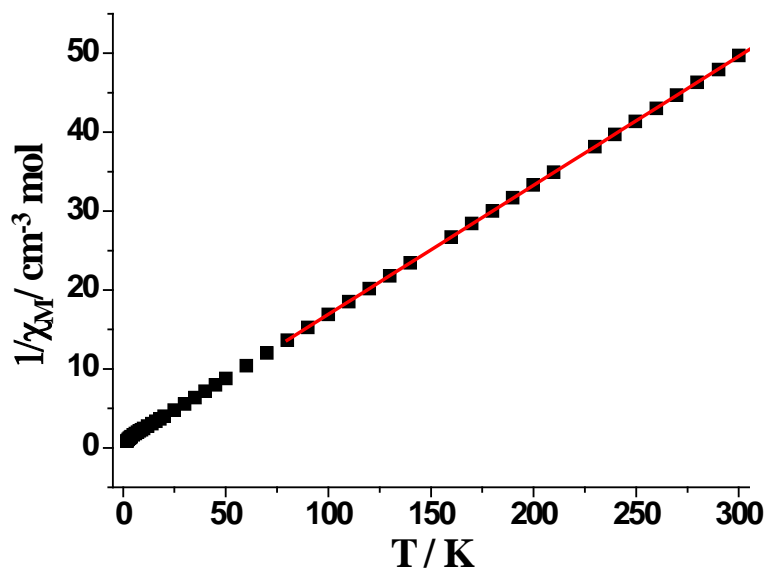

**Figure S9.** Plot of the  $1/\chi_M$  versus  $T$  for **1**. The red solid line represents the best fit of the data above 100 K.

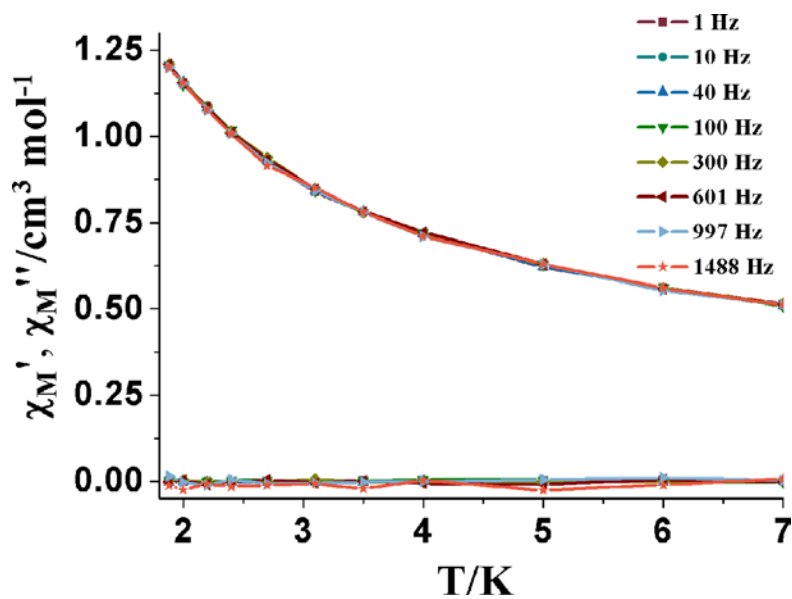

**Figure S10.** Plots of in-phase ( $\chi_M'$ , top) and out-of-phase ( $\chi_M''$ , bottom) ac magnetic susceptibility versus  $T$  at 1, 10, 40, 100, 300, 600, 1000 and 1500 Hz for **1**.

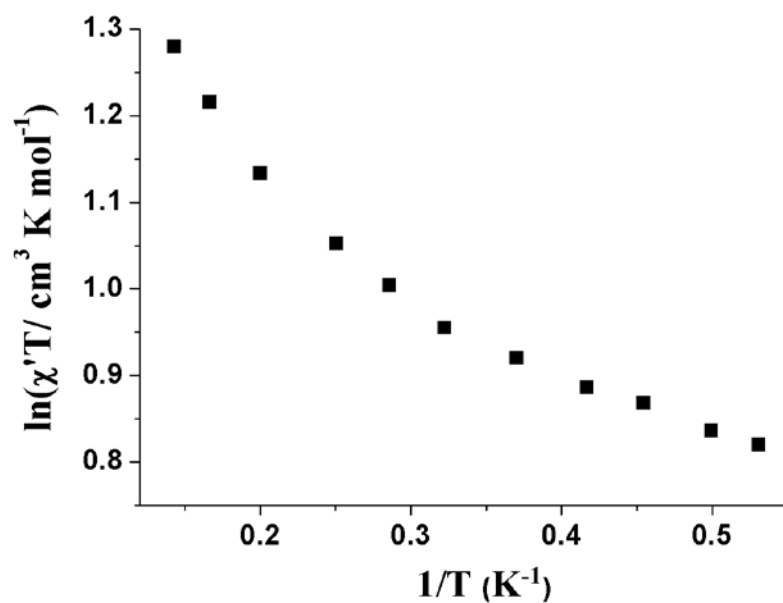

**Figure S11.** The  $\ln(\chi'T)$  versus  $T^{-1}$  plot for **1**, where  $\chi'$  is equal to the in-phase ac susceptibility at 1 Hz in zero dc field.

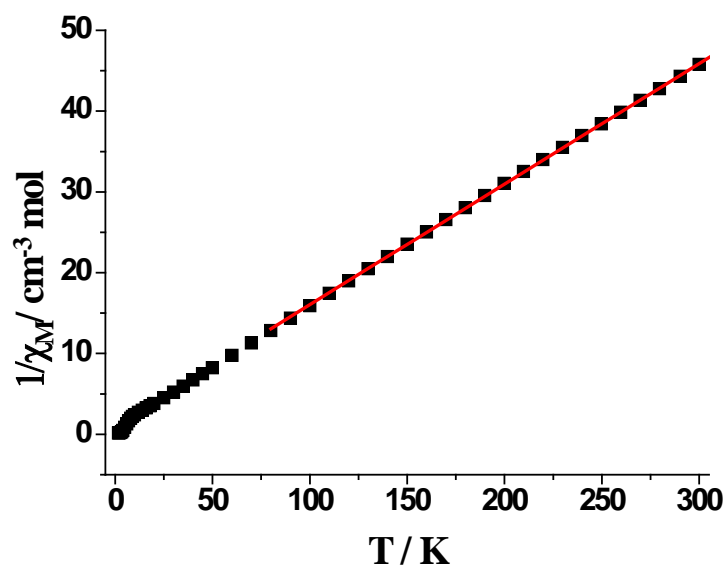

**Figure S12.** Plot of the  $1/\chi_M$  versus  $T$  for **2**. The red solid line represents the best fit of the data above 100 K.

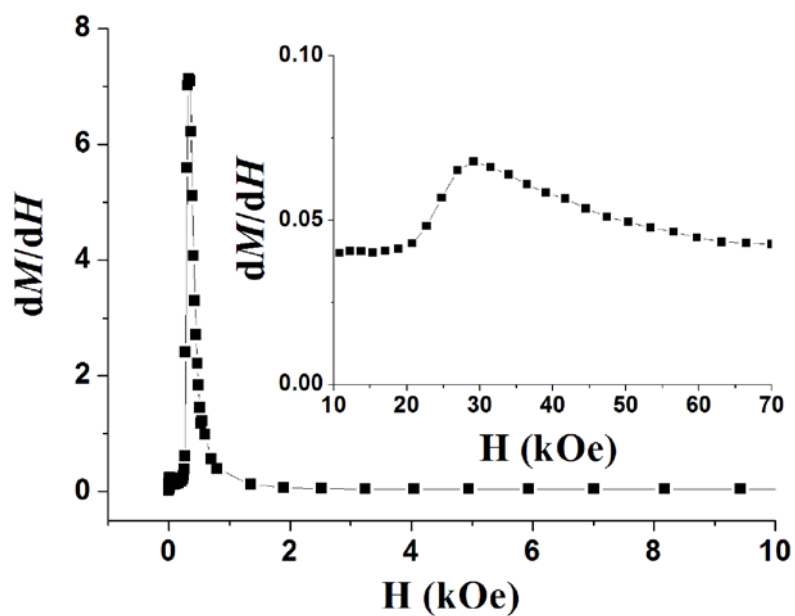

**Figure S13.** The derivative of field-dependent magnetization of **2** at 1.8 K.

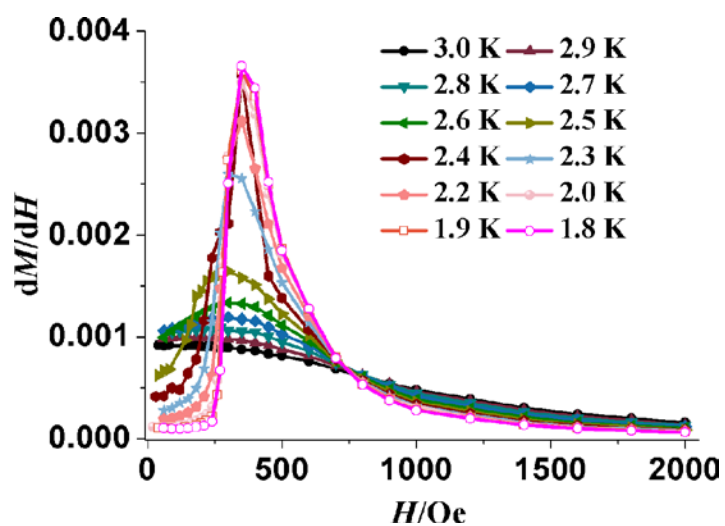

**Figure S14.** The derivative of field-dependent magnetization of **2** measured at different temperatures (1.8 – 3.0 K).

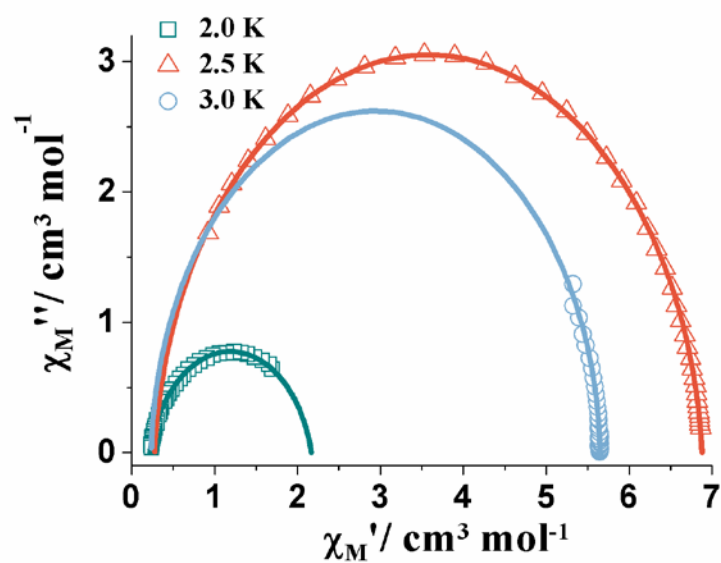

**Figure S15.** The Cole-Cole plots for **2** at 2.0 K, 2.5 K and 3.0 K. The open circles and the solid lines correspond to the experimental data and curves simulated using best fitting parameters, respectively.

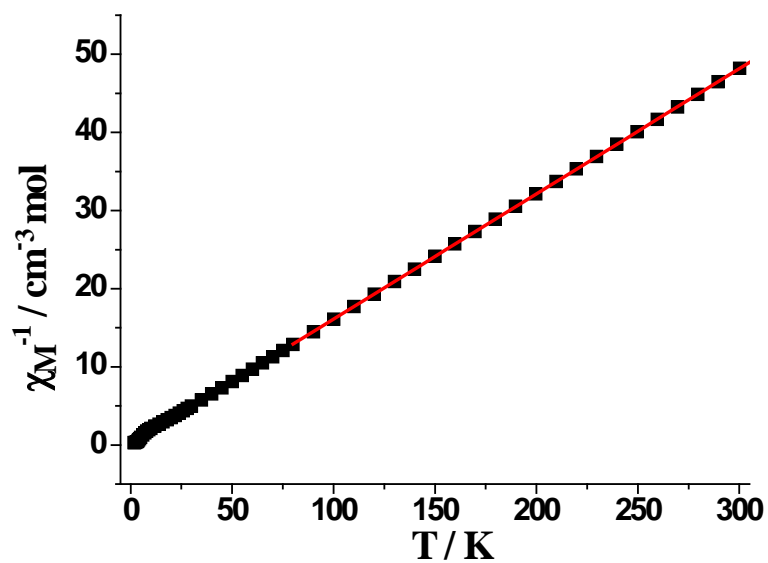

**Figure S16.** Plot of the  $1/\chi_M$  versus T for **3**. The red solid line represents the best fit of the data above 100 K.

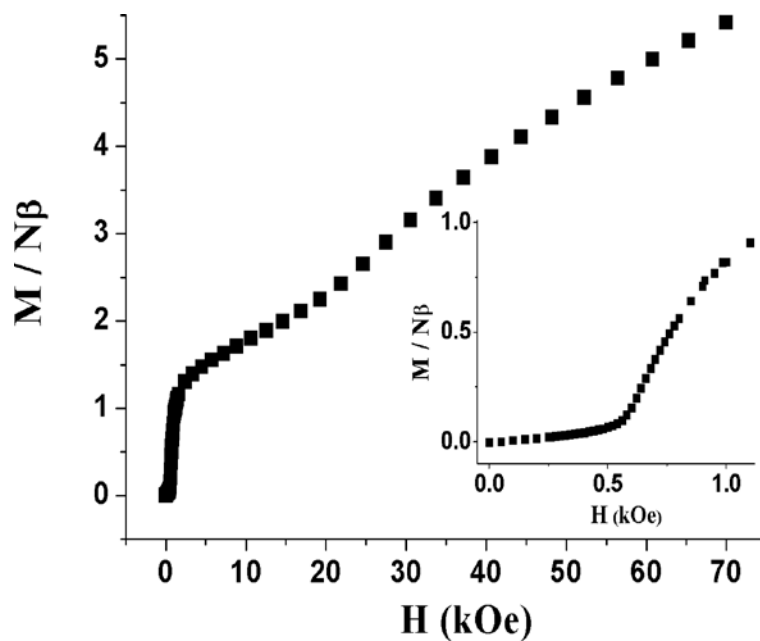

**Figure S17.** Field-dependent magnetization of **3** at 1.8 K. Inset shows an expansion of the low field region.

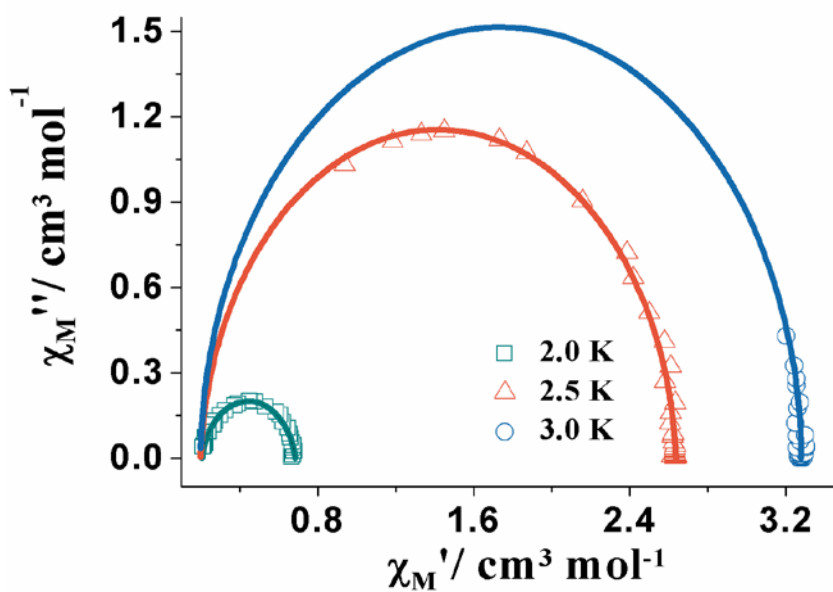

**Figure S18.** The Cole-Cole plots for **3** under zero dc field at 2.0 K, 2.5 K and 3.0 K. The open circles and the solid lines correspond to the experimental data and curves simulated using best fitting parameters, respectively.
